# Supplementary material for: Excited-state N–H⋯S hydrogen bond between indole and dimethyl sulfide: time-dependent density functional theory study
Source: Royal Society of Chemistry journal article supplement (doi:10.1039/c1cp20729f), 2011-01-01
Supplement: c1cp20729f.pdf [file c1cp20729f.pdf]

The optimized atomic coordinate of ph conformer in ground state

25

Energy = -841.6569271312

|   |            |            |            |
|---|------------|------------|------------|
| N | 0.0729428  | -0.8219140 | -0.0307217 |
| C | 0.9040627  | -1.9197956 | 0.0417211  |
| C | 2.2088467  | -1.5120669 | 0.0834540  |
| C | 3.1981086  | 0.9086010  | 0.0443259  |
| C | 2.8280045  | 2.2414936  | -0.0162650 |
| C | 1.4738609  | 2.6167422  | -0.0874132 |
| C | 0.4661208  | 1.6654798  | -0.0984048 |
| C | 2.2020407  | -0.0787495 | 0.0351261  |
| C | 0.8399154  | 0.3219082  | -0.0364683 |
| H | -0.9399663 | -0.8536548 | -0.0685203 |
| H | 0.4904293  | -2.9154461 | 0.0571343  |
| H | 3.0717661  | -2.1557454 | 0.1411699  |
| H | 4.2445689  | 0.6309616  | 0.0981725  |
| H | 3.5899883  | 3.0116288  | -0.0095547 |
| H | 1.2152793  | 3.6678798  | -0.1351144 |
| H | -0.5761488 | 1.9583906  | -0.1544738 |
| S | -3.4818414 | -0.7168272 | -0.0683520 |
| C | -3.7237781 | 0.3318412  | 1.4136498  |
| C | -3.7798792 | 0.5202756  | -1.3854762 |
| H | -4.7327191 | 0.7439323  | 1.4285876  |
| H | -3.5911134 | -0.3113619 | 2.2824940  |
| H | -2.9907380 | 1.1376279  | 1.4530766  |
| H | -3.0488332 | 1.3277703  | -1.3440317 |
| H | -3.6813880 | 0.0008206  | -2.3375993 |
| H | -4.7881248 | 0.9264751  | -1.3059886 |

The optimized atomic coordinate of ph conformer in the S<sub>1</sub> state

25

Energy = -841.6443768547

|   |            |            |            |
|---|------------|------------|------------|
| N | -0.0079904 | -0.9037564 | -0.0227847 |
| C | 0.7851869  | -1.9762599 | 0.0044953  |
| C | 2.1296988  | -1.4995344 | 0.0329365  |
| C | 3.1168180  | 0.9231424  | 0.0358273  |
| C | 2.6739326  | 2.2788707  | 0.0073506  |
| C | 1.3357590  | 2.6143109  | -0.0260033 |
| C | 0.2869229  | 1.6278798  | -0.0338881 |
| C | 2.0932217  | -0.0636871 | 0.0208572  |
| C | 0.7502157  | 0.2963224  | -0.0135683 |
| H | -1.0321622 | -0.9346459 | -0.0419920 |
| H | 0.4018478  | -2.9824347 | 0.0040823  |
| H | 3.0051135  | -2.1298731 | 0.0585838  |

|   |            |            |            |
|---|------------|------------|------------|
| H | 4.1643878  | 0.6609659  | 0.0614837  |
| H | 3.4117168  | 3.0726467  | 0.0118246  |
| H | 1.0572446  | 3.6617245  | -0.0475425 |
| H | -0.7578519 | 1.8961474  | -0.0669681 |
| S | -3.4163297 | -0.7177049 | -0.0248391 |
| C | -3.5171774 | 0.4235686  | 1.4078846  |
| C | -3.5722534 | 0.4802659  | -1.4052278 |
| H | -4.4732602 | 0.9466174  | 1.4070265  |
| H | -3.4499160 | -0.1897794 | 2.3054145  |
| H | -2.6945449 | 1.1396107  | 1.4033090  |
| H | -2.7424077 | 1.1876770  | -1.4126253 |
| H | -3.5556989 | -0.0978524 | -2.3281051 |
| H | -4.5210665 | 1.0120419  | -1.3370037 |

The optimized atomic coordinate of ph conformer in the S<sub>2</sub> state

25

Energy = -841.6526289043

|   |            |            |            |
|---|------------|------------|------------|
| N | 0.0477907  | -0.7990355 | -0.0333215 |
| C | 0.8671919  | -1.9232502 | 0.0401208  |
| C | 2.1909887  | -1.5075097 | 0.0814477  |
| C | 3.2344275  | 0.8813374  | 0.0463065  |
| C | 2.8431377  | 2.2417647  | -0.0151492 |
| C | 1.4706008  | 2.6382763  | -0.0861577 |
| C | 0.4266438  | 1.6953143  | -0.0979800 |
| C | 2.2102280  | -0.0933993 | 0.0348903  |
| C | 0.8151547  | 0.3347621  | -0.0385715 |
| H | -0.9680925 | -0.8213478 | -0.0678402 |
| H | 0.4440831  | -2.9133488 | 0.0545610  |
| H | 3.0462966  | -2.1618425 | 0.1387855  |
| H | 4.2773413  | 0.6020001  | 0.0993400  |
| H | 3.6017186  | 3.0139770  | -0.0087840 |
| H | 1.2373090  | 3.6940834  | -0.1324415 |
| H | -0.6109062 | 1.9940180  | -0.1546053 |
| S | -3.4416808 | -0.7226017 | -0.0647735 |
| C | -3.7069632 | 0.3239685  | 1.4160484  |
| C | -3.7630420 | 0.5050497  | -1.3868315 |
| H | -4.7306580 | 0.6970542  | 1.4417296  |
| H | -3.5393705 | -0.3105318 | 2.2851836  |
| H | -3.0034020 | 1.1564664  | 1.4435251  |
| H | -3.0611939 | 1.3375909  | -1.3340129 |
| H | -3.6296595 | -0.0107652 | -2.3366088 |
| H | -4.7865363 | 0.8742337  | -1.3243327 |

The optimized atomic coordinate of py conformer in ground state

25

Energy = -841.6567128168

|   |            |            |            |
|---|------------|------------|------------|
| N | 0.1018544  | 0.5445987  | -0.0040749 |
| C | 0.3413577  | 1.9026347  | -0.0034443 |
| C | 1.6887635  | 2.1368696  | -0.0011676 |
| C | 3.6732304  | 0.4333565  | 0.0019199  |
| C | 3.9494761  | -0.9232641 | 0.0022017  |
| C | 2.9138858  | -1.8764101 | 0.0004254  |
| C | 1.5829504  | -1.4912625 | -0.0016887 |
| C | 2.3360220  | 0.8569457  | -0.0002254 |
| C | 1.3065619  | -0.1229413 | -0.0020302 |
| H | -0.8144306 | 0.1103854  | -0.0048042 |
| H | -0.4792573 | 2.6022871  | -0.0047485 |
| H | 2.1629361  | 3.1051427  | -0.0003200 |
| H | 4.4787324  | 1.1590092  | 0.0033191  |
| H | 4.9788600  | -1.2613528 | 0.0038052  |
| H | 3.1622489  | -2.9310730 | 0.0006832  |
| H | 0.7864192  | -2.2262184 | -0.0030458 |
| S | -3.1673362 | -0.8062079 | 0.0016321  |
| C | -3.8971923 | 0.1176380  | 1.4036118  |
| C | -3.9050953 | 0.1110573  | -1.4005066 |
| H | -4.9832838 | 0.0281628  | 1.3983619  |
| H | -3.5084791 | -0.3304958 | 2.3169666  |
| H | -3.6100275 | 1.1687312  | 1.3730683  |
| H | -3.6173617 | 1.1621716  | -1.3768146 |
| H | -3.5219278 | -0.3417325 | -2.3139084 |
| H | -4.9911676 | 0.0220480  | -1.3884448 |

The optimized atomic coordinate of py conformer in the S<sub>1</sub> state

25

Energy = -841.6450163237

|   |            |            |            |
|---|------------|------------|------------|
| N | 0.0902109  | 0.5744698  | -0.0037045 |
| C | 0.2765305  | 1.8992741  | -0.0034566 |
| C | 1.6877216  | 2.1177023  | -0.0013420 |
| C | 3.7074059  | 0.4545323  | 0.0018856  |
| C | 3.9617138  | -0.9502081 | 0.0021849  |
| C | 2.9423090  | -1.8802800 | 0.0005284  |
| C | 1.5508099  | -1.5067482 | -0.0015606 |
| C | 2.3373210  | 0.8407479  | -0.0002792 |
| C | 1.3259435  | -0.1187931 | -0.0018457 |
| H | -0.8259037 | 0.1210659  | -0.0042574 |
| H | -0.5387946 | 2.6019401  | -0.0046064 |
| H | 2.1583963  | 3.0888343  | -0.0006817 |

|   |            |            |            |
|---|------------|------------|------------|
| H | 4.5059092  | 1.1823366  | 0.0033111  |
| H | 4.9881909  | -1.2978008 | 0.0037906  |
| H | 3.1913520  | -2.9352141 | 0.0007990  |
| H | 0.7551323  | -2.2360366 | -0.0031132 |
| S | -3.1076111 | -0.7515351 | 0.0012279  |
| C | -3.8889344 | 0.1270296  | 1.4063579  |
| C | -3.8969532 | 0.1205122  | -1.4034702 |
| H | -4.9712853 | 0.0036613  | 1.3766147  |
| H | -3.5056534 | -0.3298725 | 2.3176126  |
| H | -3.6350102 | 1.1871766  | 1.4037408  |
| H | -3.6427541 | 1.1805846  | -1.4074395 |
| H | -3.5191666 | -0.3408838 | -2.3147555 |
| H | -4.9791397 | -0.0024162 | -1.3667699 |

The optimized atomic coordinate of py conformer in the S<sub>2</sub> state

25

Energy = -841.6523919959

|   |            |            |            |
|---|------------|------------|------------|
| N | 0.0956011  | 0.5385815  | -0.0038450 |
| C | 0.3244725  | 1.9111969  | -0.0032864 |
| C | 1.6968433  | 2.1352986  | -0.0012562 |
| C | 3.7001525  | 0.4687308  | 0.0018207  |
| C | 3.9612559  | -0.9248611 | 0.0022174  |
| C | 2.9106026  | -1.8954107 | 0.0004779  |
| C | 1.5546248  | -1.5213167 | -0.0016748 |
| C | 2.3478035  | 0.8801550  | -0.0003521 |
| C | 1.2924869  | -0.1312367 | -0.0020185 |
| H | -0.8227975 | 0.1042583  | -0.0039671 |
| H | -0.4959785 | 2.6091161  | -0.0046401 |
| H | 2.1682758  | 3.1052690  | -0.0005588 |
| H | 4.5067973  | 1.1885087  | 0.0031937  |
| H | 4.9854752  | -1.2749706 | 0.0038909  |
| H | 3.1738503  | -2.9452457 | 0.0008093  |
| H | 0.7588250  | -2.2529820 | -0.0031486 |
| S | -3.1450683 | -0.7834057 | 0.0013806  |
| C | -3.8957204 | 0.1216213  | 1.4067249  |
| C | -3.9037554 | 0.1151020  | -1.4038241 |
| H | -4.9806272 | 0.0170515  | 1.3955431  |
| H | -3.5054521 | -0.3312793 | 2.3170662  |
| H | -3.6223270 | 1.1769057  | 1.3892594  |
| H | -3.6299964 | 1.1703768  | -1.3930307 |
| H | -3.5189998 | -0.3422888 | -2.3142683 |
| H | -4.9886034 | 0.0109041  | -1.3857423 |

Calculated electronic excitation energy ( $\text{cm}^{-1}$ ) (in TD-BP86 and RICC2 method) of isolated indole, indole- $\text{H}_2\text{O}$  and indole- $\text{Me}_2\text{S}$  (py and ph), also that of the corresponding experiment results (EX).

|              | indole       |       | Indole- $\text{H}_2\text{O}$ |       | Indole- $\text{Me}_2\text{S}$ (py) |       | Indole- $\text{Me}_2\text{S}$ (ph) |       |
|--------------|--------------|-------|------------------------------|-------|------------------------------------|-------|------------------------------------|-------|
|              | TD-BP86      | RICC2 | TD-BP86                      | RICC2 | TD-BP86                            | RICC2 | TD-BP86                            | RICC2 |
| $\text{S}_1$ | 35536(0.014) | 39222 | 32085(0.000)                 | 39003 | 34186(0.000)                       | 39003 | 34306(0.014)                       | 38783 |
| EX           | 35241        |       | 35109                        |       | 35071                              |       | 35071                              |       |
| $\text{S}_2$ | 37349(0.044) | 41197 | 34890(0.052)                 | 40429 | 35249(0.062)                       | 40693 | 35196(0.044)                       | 40188 |
| $\text{S}_3$ | 44688(0.000) | 50196 | 35851(0.000)                 | 49362 | 37253(0.019)                       | 48704 | 37160(0.018)                       | 48770 |
| $\text{S}_4$ | 45597(0.154) | 51448 | 37181(0.016)                 | 5.943 | 37993(0.002)                       | 51009 | 38198(0.000)                       | 50218 |
| $\text{S}_5$ | 47545(0.403) | 53335 | 45569(0.192)                 | 53028 | 38704(0.000)                       | 52677 | 38505(0.002)                       | 52721 |
| $\text{S}_6$ | 48227(0.000) | 54169 | 46444(0.000)                 | 53269 | 38802(0.000)                       | 52874 | 39295(0.000)                       | 54059 |
